# Supplementary material for: A colorimetric and turn-on fluorescent chemosensor for selective detection of Hg2+: theoretical studies and intracellular applications
Source: Royal Society of Chemistry journal article supplement (doi:10.1039/c5ra06582h), 2015-01-01
Supplement: c5ra06582h1.pdf [file c5ra06582h1.pdf]

## Supporting Information

# Colorimetric and Turn-on fluorescent chemosensor for selective detection of Hg<sup>2+</sup>: Theoretical studies and Intracellular applications

Rimi Roy,<sup>a</sup> Soumyadipta Rakshit,<sup>b</sup> Sanjay Bhar<sup>\*a</sup> and Subhash Chandra Bhattacharya<sup>\*b</sup>

<sup>a</sup>Department of Chemistry, Organic Chemistry Section, Jadavpur University, Kolkata 700 032, India.

Email: [sanjaybharin@yahoo.com](mailto:sanjaybharin@yahoo.com); [sanjay\\_bhar@chemistry.jdvu.ac.in](mailto:sanjay_bhar@chemistry.jdvu.ac.in).

Fax: + 91 033 24137902; Tel: +91 8697179547.

<sup>b</sup>Department of Chemistry, Physical Chemistry Section, Jadavpur University, Kolkata 700 032, India.

E-mail: [sbjuchem@yahoo.com](mailto:sbjuchem@yahoo.com); [scbhattacharyya@chemistry.jdvu.ac.in](mailto:scbhattacharyya@chemistry.jdvu.ac.in).

Fax: +91 033 24146584; Tel: +91 033 2414 6223.

## Table of Contents

|                                                                                        |     |
|----------------------------------------------------------------------------------------|-----|
| 1. Synthetic procedure of SBPH- -----                                                  | S2  |
| 2. <sup>1</sup> H NMR, <sup>13</sup> C NMR and HRMS spectra of SBPH- -----             | S2  |
| 3. <sup>1</sup> H NMR spectra of DEAS–BPH (Fig. S1) -----                              | S4  |
| 4. <sup>13</sup> C NMR spectra of DEAS–BPH (Fig. S2) -----                             | S4  |
| 5. FT-IR spectra of DEAS–BPH and its complex with Hg <sup>2+</sup> (Fig. S3)- -----    | S5  |
| 6. HRMS spectra of DEAS–BPH and the complex with Hg <sup>2+</sup> (Fig. S4)- -----     | S5  |
| 7. UV-vis titration spectra of DEAS–BPH with different cations (Fig. S5) -----         | S7  |
| 8. UV-vis spectra of SBPH with different cations (Fig. S6) -----                       | S8  |
| 9. Emission spectra of SBPH with different cations (Fig. S7)- -----                    | S8  |
| 10. Fluorescence response of DEAS–BPH on exciting at 416nm and 450nm (Fig. S8) -----   | S9  |
| 11. Fluorescence titration spectra of DEAS–BPH with different cations (Fig. S9)- ----- | S10 |
| 12. Effect of pH (Fig. S10)- -----                                                     | S11 |
| 13. General procedure for Job plot by UV–vis method -----                              | S12 |
| 14. Determination of Association constant -----                                        | S12 |
| 15. Determination of Detection limit -----                                             | S13 |
| 16. Theoretical and computational study- -----                                         | S14 |
| 17. Reversibility Study- -----                                                         | S27 |

## 1. Synthetic procedure of SBPH:

A mixture of salicylaldehyde **1b** (0.200 g, 1.64 mmol) and 1-(diphenylmethylene)hydrazine or benzophenonehydrazone **2** (0.322 g, 1.64 mmol) was dissolved in 12 mL of dry ethanol in presence of 4 drops of acetic acid and the resulting solution was stirred under reflux for 4 h at an ambient temperature. After completion of the reaction, monitored by TLC, the solvent was removed under reduced pressure, and the resulted mixture was diluted with dichloromethane (30 mL). The organic layer was then washed twice with water and dried over anhydrous Na<sub>2</sub>SO<sub>4</sub>. Evaporation of the solvent followed by purification gave the product as a light yellow solid (0.433 g, 1.44 mmol, yield = 88%)

**M.p.:** 65–66 °C;

**<sup>1</sup>H-NMR (300 MHz, CDCl<sub>3</sub>):** δ 6.94–7.03 (m, 2H), 7.34–7.61 (m, 10H), 7.93 (d, *J* = 6.8 Hz, 2H), 8.90 (s, 1H), 11.42 (broad s, 1H).

**<sup>13</sup>C-NMR (75 MHz, CDCl<sub>3</sub>):** δ 76.14, 117.17, 118.22, 119.47, 126.80, 127.58, 128.60, 128.70, 128.78, 129.37, 131.18, 132.49, 133.05, 135.94, 137.35, 144.38, 159.98, 164.33, 168.95.

**HRMS (ESI-TOF, *m/z*):** calcd for C<sub>20</sub>H<sub>17</sub>N<sub>2</sub>O [*M* + H<sup>+</sup>] 301.1342, found, 301.1340.

## 2. <sup>1</sup>H NMR, <sup>13</sup>C NMR and HRMS spectra of SBPH:

### (a) <sup>1</sup>H NMR (300 MHz, CDCl<sub>3</sub>) spectra of SBPH:

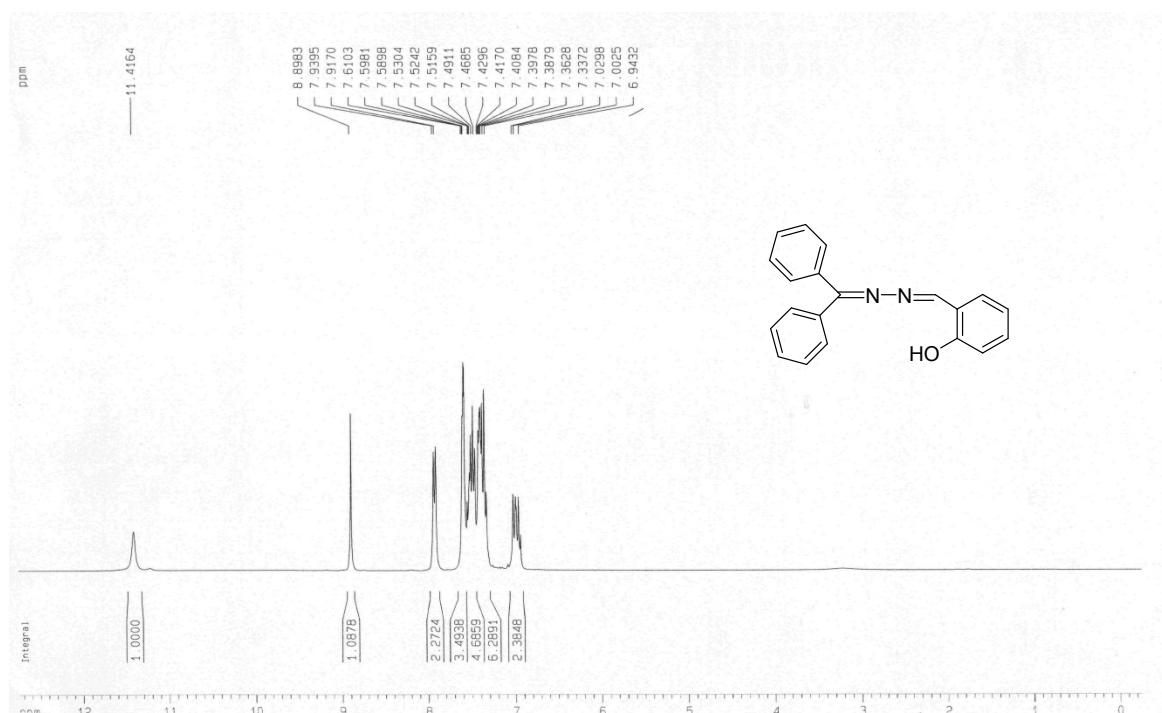

**(b)  $^{13}\text{C}$  NMR (75 MHz,  $\text{CDCl}_3$ ) spectra of SBPH:**

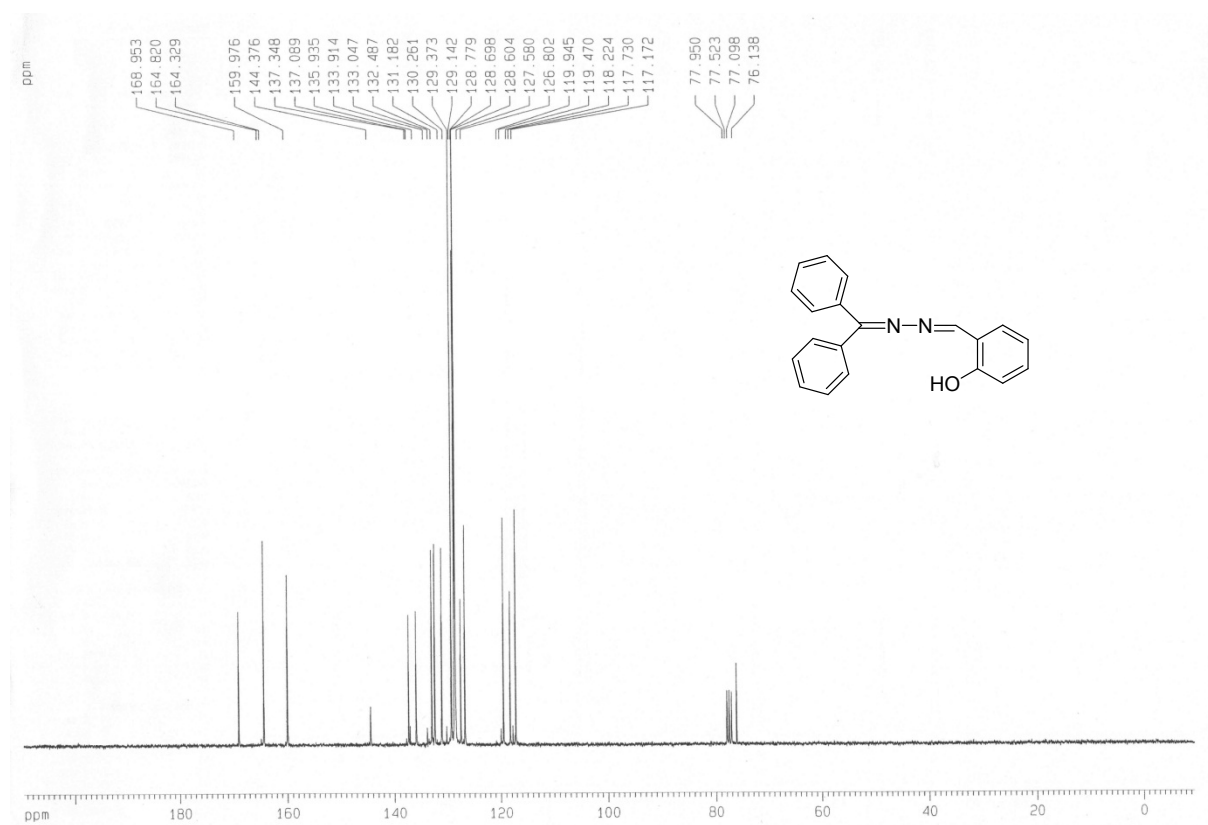

**(c) HRMS spectra (ESI-TOF) of SBPH:**

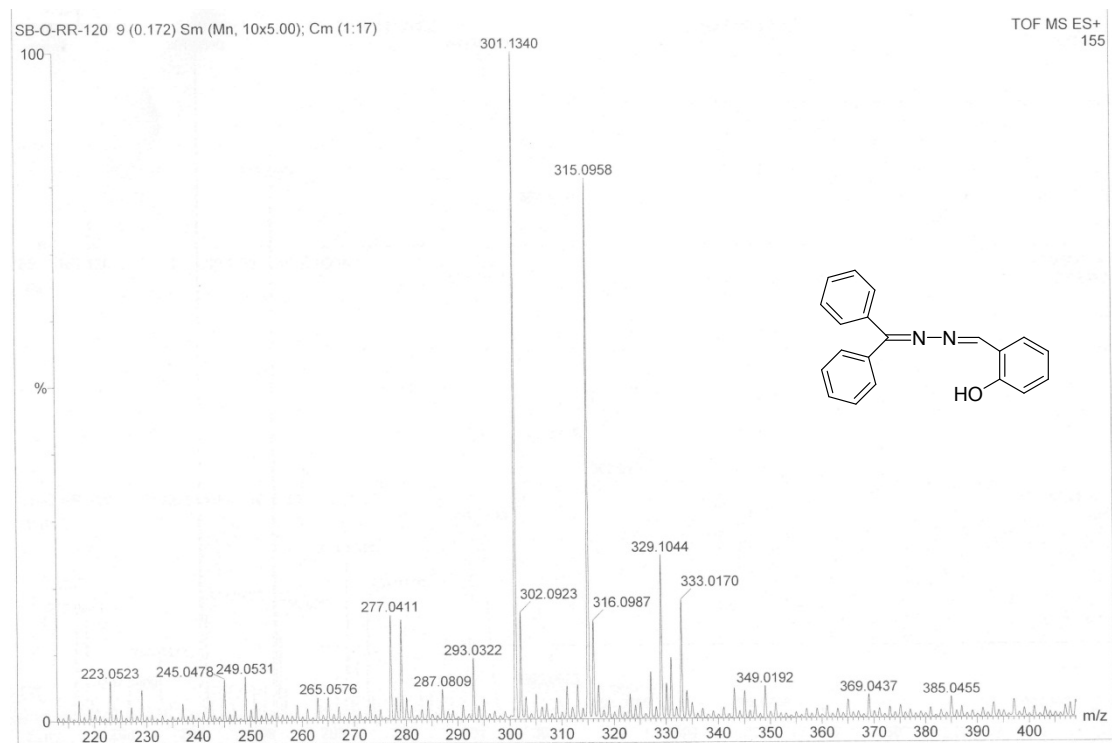

### 3. $^1\text{H}$ NMR spectra of DEAS-BPH:

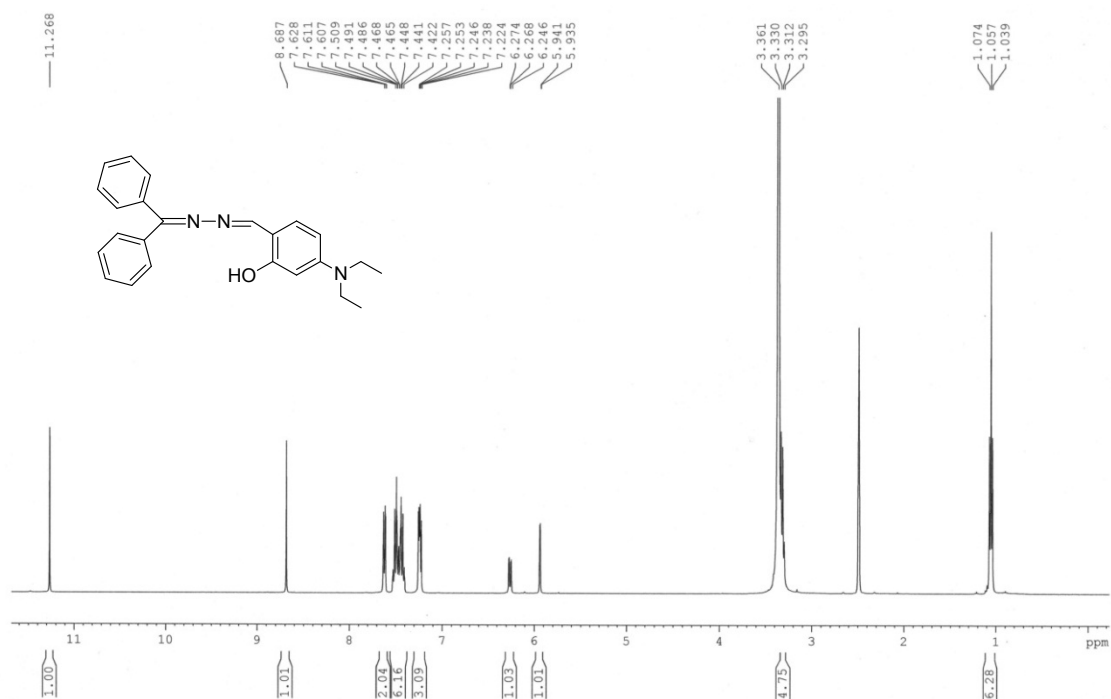

Fig.S1  $^1\text{H}$  NMR spectra (400 MHz) of DEAS-BPH in  $\text{DMSO-}d_6$ .

### 4. $^{13}\text{C}$ NMR spectra of DEAS-BPH:

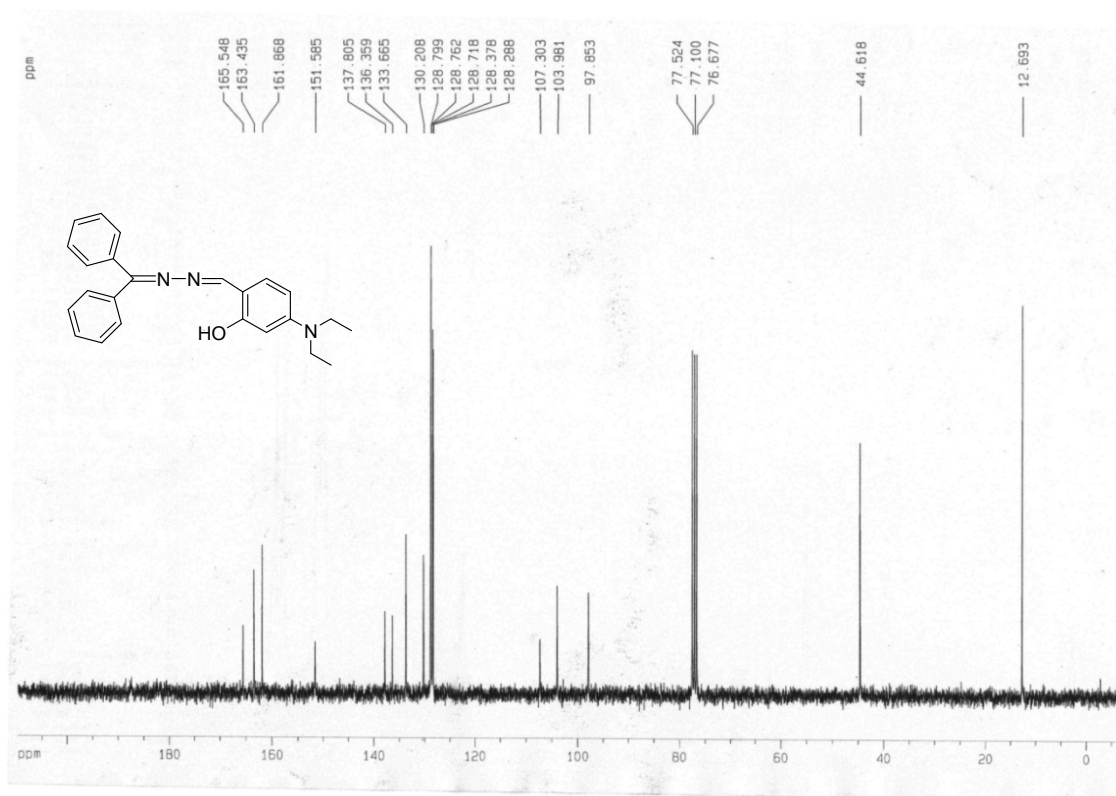

Fig.S2  $^{13}\text{C}$  NMR spectra (75 MHz) of DEAS-BPH in  $\text{CDCl}_3$ .

## 5. FT-IR spectra of DEAS-BPH and its complex with Hg<sup>2+</sup>:

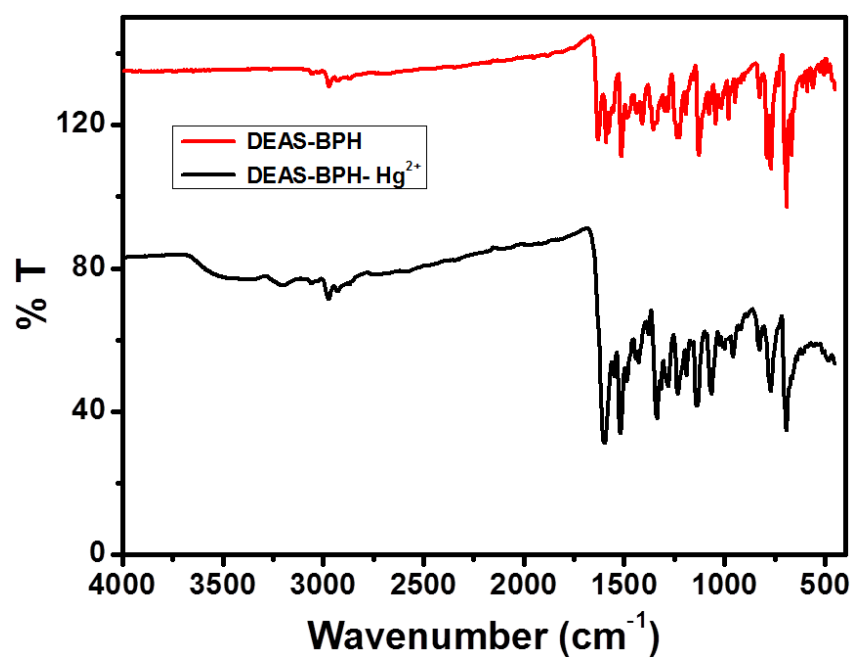

Fig.S3 FT-IR spectra of the receptor and its complex with Hg<sup>2+</sup>.

## 6. HRMS spectra (ESI-TOF) of DEAS-BPH and the complex with Hg<sup>2+</sup>:

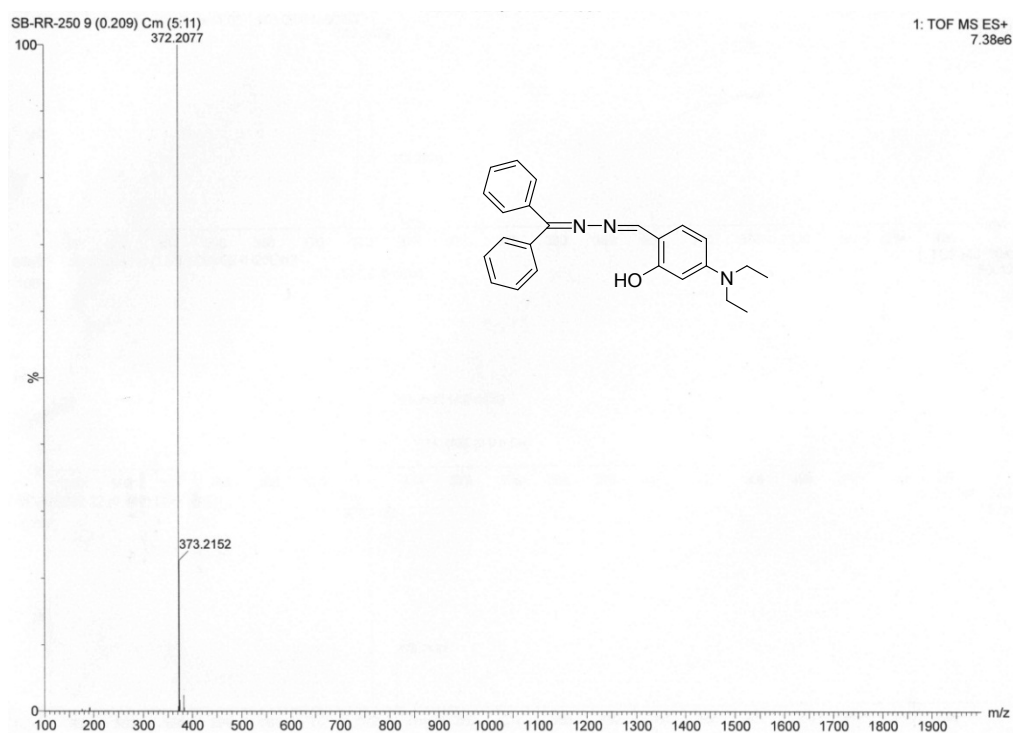

Fig.S4a HRMS spectra (ESI-TOF) of DEAS-BPH.

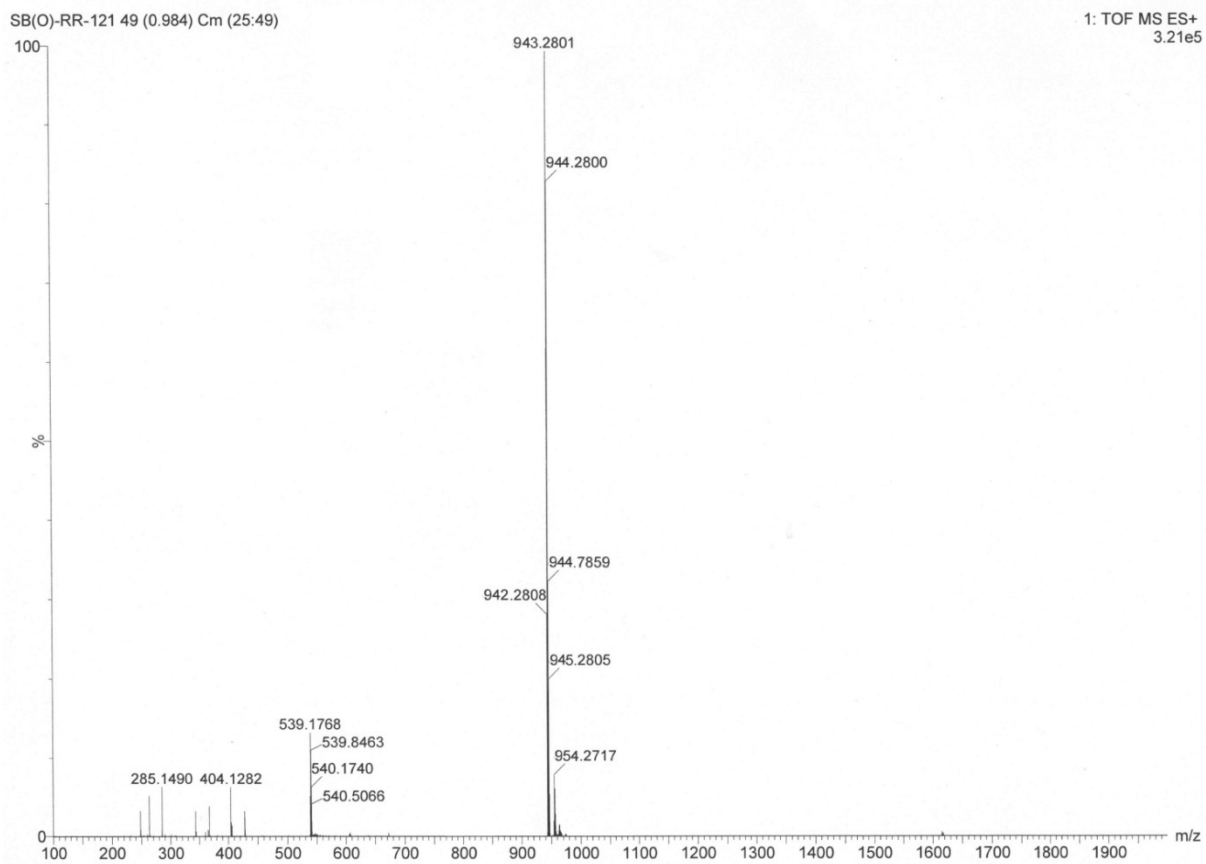

**Fig.S4b** HRMS spectra (ESI-TOF) of the complex of **DEAS-BPH** with  $\text{Hg}^{2+}$ .

7. UV-vis Absorption titration spectra of the receptor with different guest cations in CH<sub>3</sub>CN–H<sub>2</sub>O (4:1, v/v, pH = 7.2):

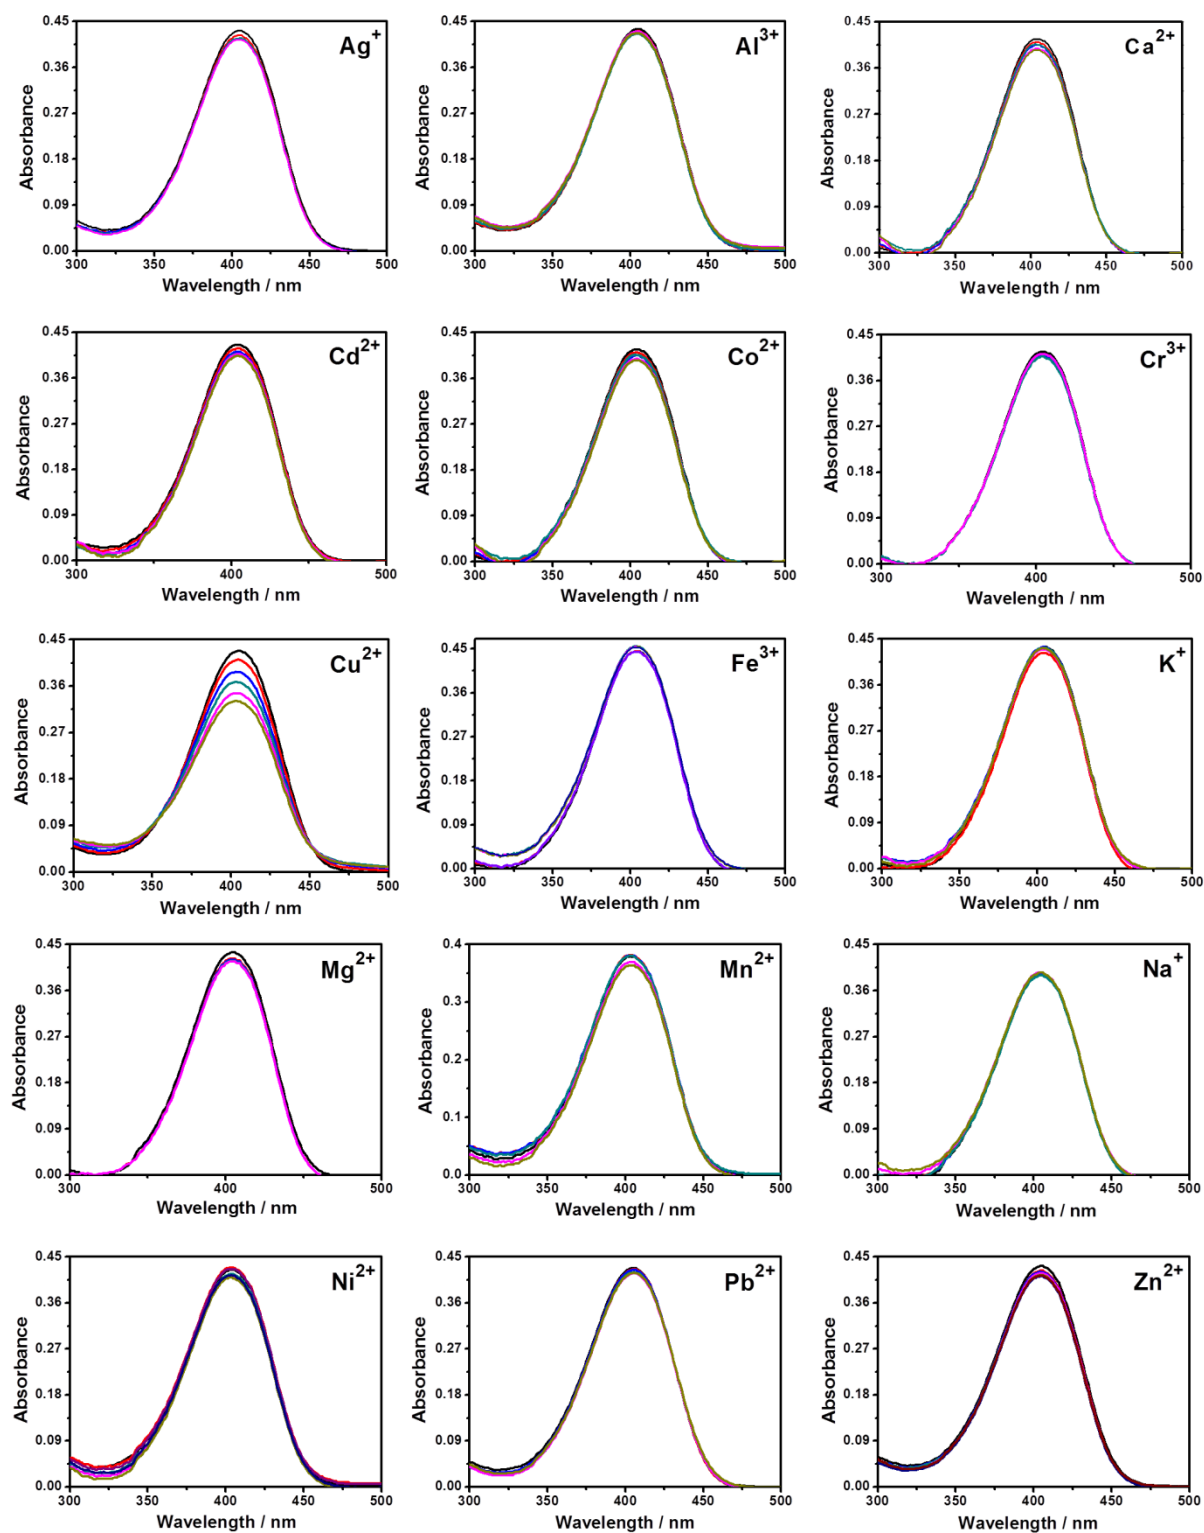

Fig. S5 UV-vis Absorption titration spectra of the receptor with different guest cations in CH<sub>3</sub>CN–H<sub>2</sub>O (4:1, v/v, pH = 7.2).

### 8. UV-vis spectra of SBPH with different cations:

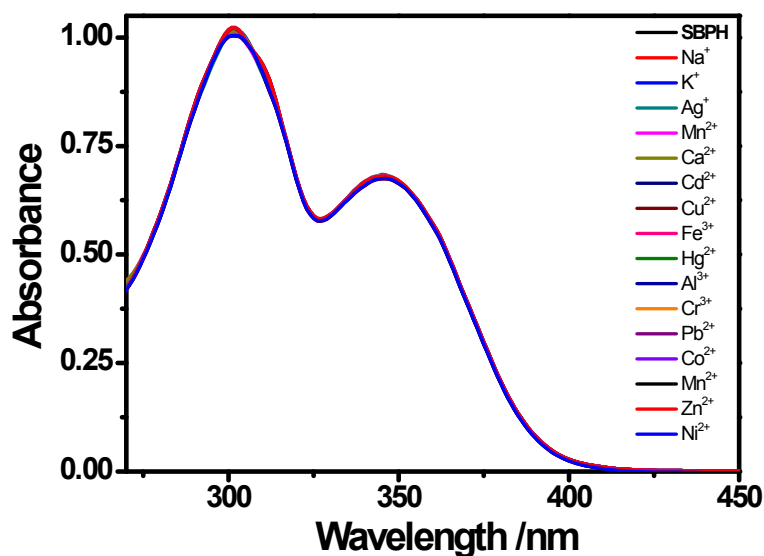

**Fig. S6** UV-vis spectra of SBPH in the presence of 4 equivalents of various metal ions in CH<sub>3</sub>CN–H<sub>2</sub>O (4:1, v/v, pH = 7.2).

### 9. Emission spectra of SBPH with different cations:

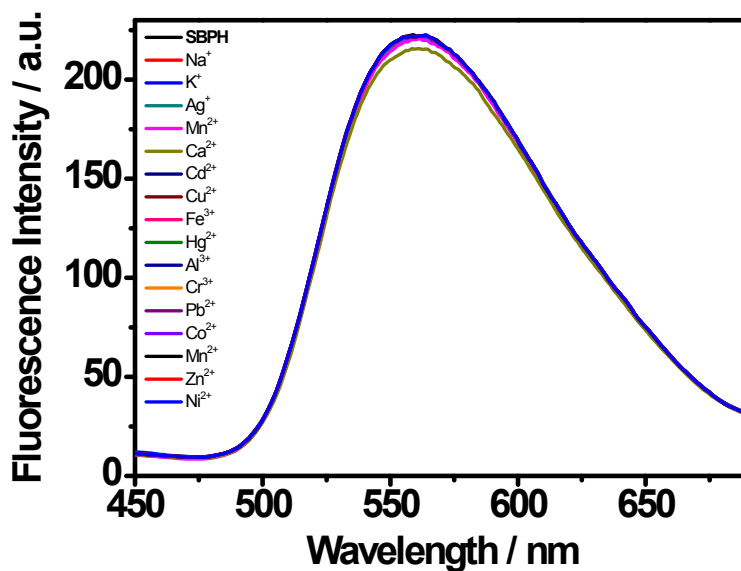

**Fig. S7** Emission spectra of SBPH in the presence of 3 equivalents of various metal ions in CH<sub>3</sub>CN–H<sub>2</sub>O (4:1, v/v, pH = 7.2).



10. Difference in spectrofluorometric response upon excitation at the isosbestic point and the absorption maxima of the complex:

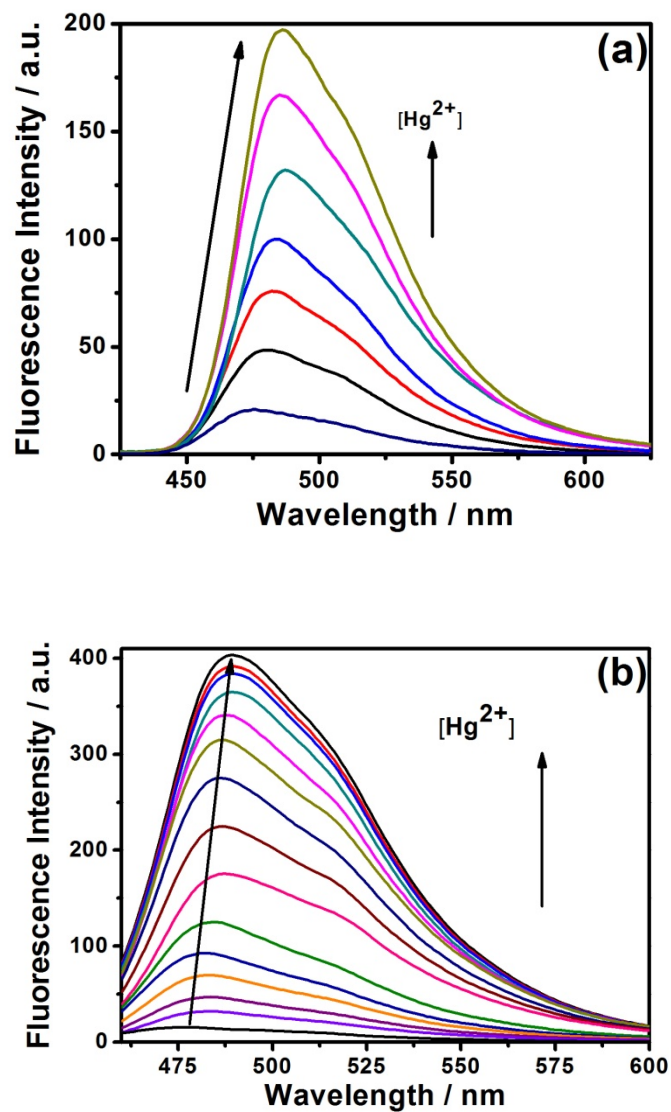

**Figure S8:** Fluorescence spectra of DEAS-BPH upon addition of Hg<sup>2+</sup> up to saturation when excited (a) at isosbestic point ( $\lambda_{ex}= 416$  nm), (b) at complex absorption maxima ( $\lambda_{ex}= 450$  nm).

**11. Fluorescence titration spectra of the receptor with different guest cations in CH<sub>3</sub>CN–H<sub>2</sub>O (4:1, v/v, pH = 7.2):**

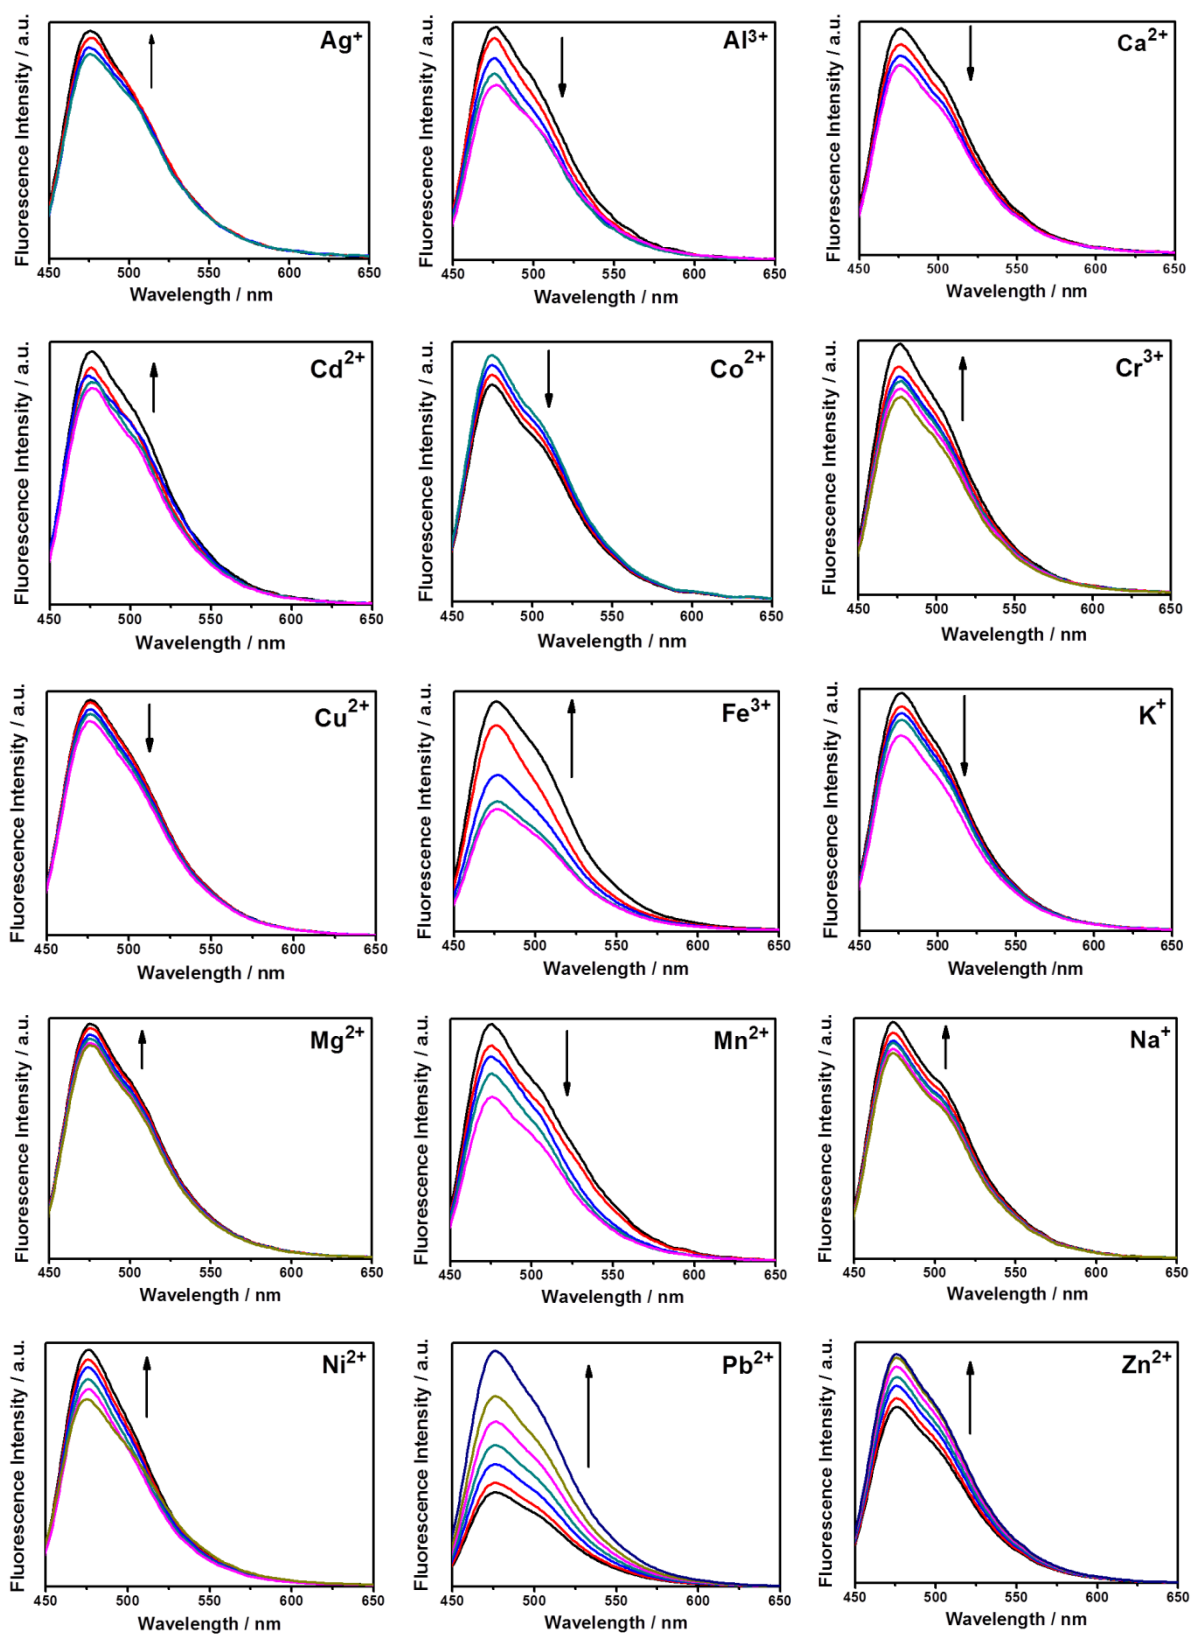

**Fig. S9** Fluorescence titration spectra of the receptor with different guest cations in CH<sub>3</sub>CN–H<sub>2</sub>O (4:1, v/v, pH = 7.2).

## 12. Effect of pH:

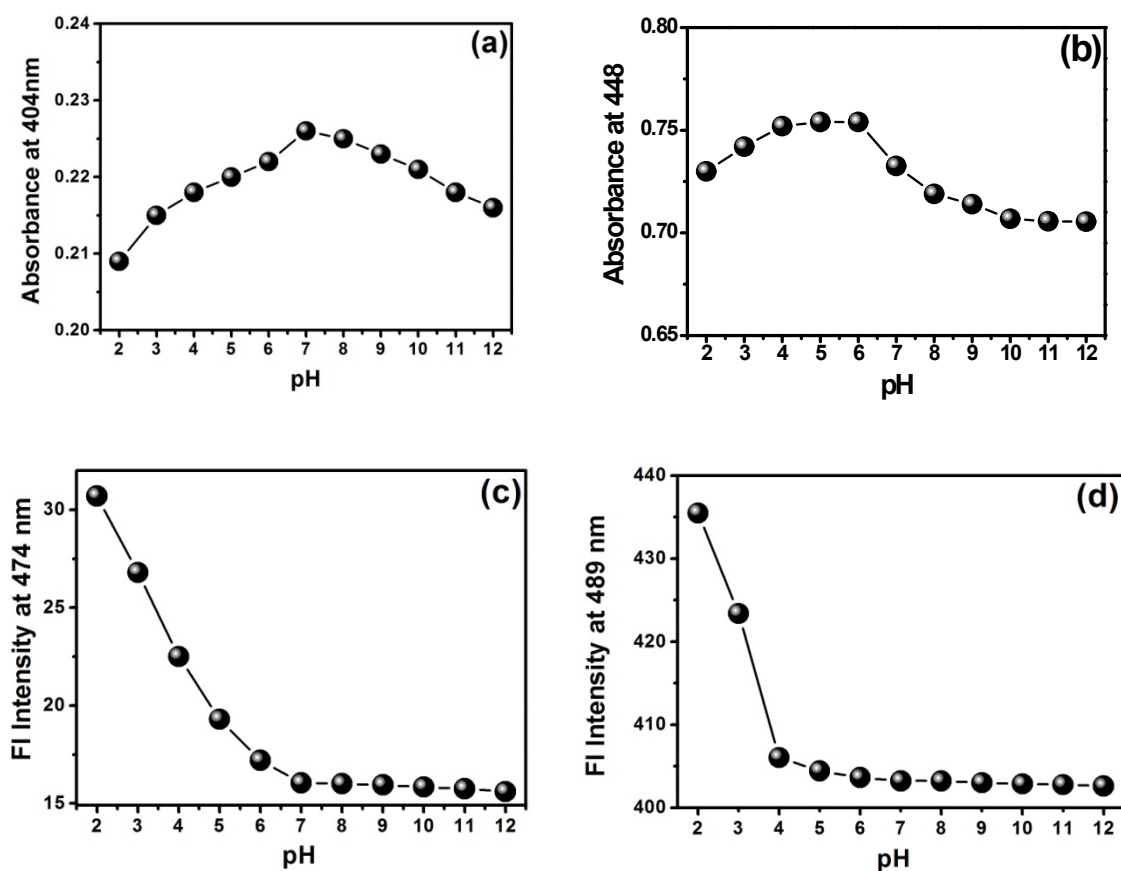

**Fig. S10** (a) Effect of pH on the absorbance of the probe **DEAS-BPH** at 404 nm, (b) effect of pH on the absorbance at 448 nm for the complex of **DEAS-BPH** with Hg<sup>2+</sup> in the pH range of 2.0–12.0 in CH<sub>3</sub>CN–H<sub>2</sub>O (4:1, v/v), (c) fluorescence response of the probe **DEAS-BPH** at 474 nm, (d) fluorescence response of the complex of **DEAS-BPH** with Hg<sup>2+</sup> at 489 nm as a function of pH (2.0–12.0) in CH<sub>3</sub>CN–H<sub>2</sub>O (4:1, v/v). pH is adjusted by using aqueous solutions of 1 M HCl or 1 M NaOH.

The pK<sub>a</sub> value for the probe is calculated according to the reference – G. K. Vegesna, J. Janjanam, J. Bi, F.-T. Luo, J. Zhang, C. Olds, A. Tiwari and H. Liu, *J. Mater. Chem. B*, 2014, **2**, 4500.

The calculated pK<sub>a</sub> value is 7.1.

### 13. General procedure for drawing Job plot by UV-vis method:

Job plots were drawn by plotting  $\Delta AX_{\text{host}}$  vs  $X_{\text{host}}$  (Fig. 7a,  $\Delta A$  = change of intensity of the absorbance spectrum during titration and  $X_{\text{host}}$  is the mole fraction of the host in each case, respectively) and  $\Delta AX_{\text{metal}}$  vs  $X_{\text{metal}}$  (Fig. 7b,  $\Delta A$  = change of intensity of the absorbance spectrum during titration and  $X_{\text{metal}}$  is the mole fraction of the  $\text{Hg}^{2+}$  in each case, respectively).

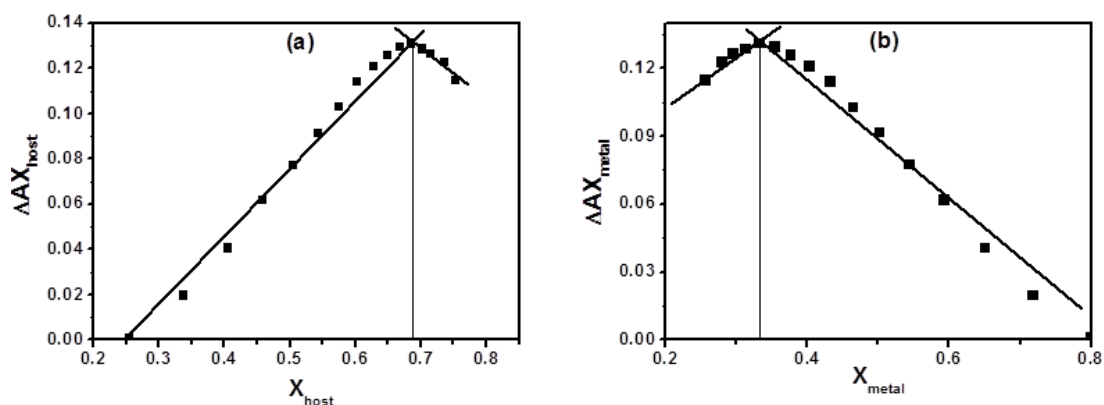

Fig. S11 Job's plot diagram of receptor for  $\text{Hg}^{2+}$  ion

### 14. Determination of Association constant:

**By UV-vis method:** The association constant ( $K_a$ ) was calculated according to the Benesi-Hildebrand equation for 2:1 complex formation stated below.

$$1/(A - A_0) = 1/\{K_a(A_{\text{max}} - A_0)[\text{Hg}^{2+}]^2\} + 1/[A_{\text{max}} - A_0]$$

Here,  $A_0$  is the absorbance of receptor in the absence of guest,  $A$  is the absorbance recorded in the presence of added guest and  $A_{\text{max}}$  is absorbance in presence of added  $[\text{Hg}^{2+}]_{\text{max}}$ . The association constant ( $K_a$ ) could be determined from the slope of the straight line of the plot of  $1/(A - A_0)$  against  $1/[\text{Hg}^{2+}]^2$  and is found to be  $1.15 \times 10^{10} \text{ M}^{-2}$ .

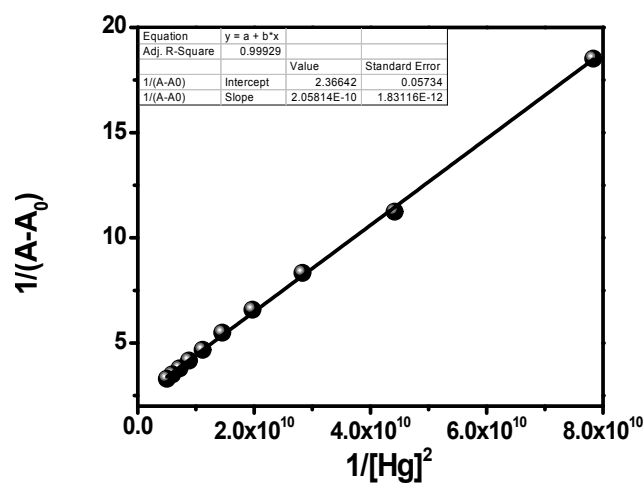

**Fig. S12a:** Benesi-Hildebrand plot from absorption titration data of receptor (20  $\mu\text{M}$ ) with  $\text{Hg}^{2+}$ .

**By fluorescence method:** The association constant ( $K_a$ ) value of  $\text{Hg}^{2+}$  with receptor has been determined from the emission intensity data following the modified Benesi–Hildebrand equation,

$$1/\Delta I = 1/\Delta I_{max} + \{(1/K_a[\text{Hg}^{2+}]^2) \times (1/\Delta I_{max})\}$$

Here  $\Delta I = I_A - I_{A_0}$  and  $\Delta I_{max} = I_{A_{max}} - I_{A_0}$ ; where  $I_{A_0}$ ,  $I_A$  and  $I_{A_{max}}$  are the emission intensities of receptor considered in the absence of  $\text{Hg}^{2+}$ , at an intermediate  $\text{Hg}^{2+}$  concentration, and at a concentration of complete saturation, respectively. From the plot of  $1/\Delta I$  against  $1/[\text{Hg}^{2+}]^2$ , the value of  $K_a$  has been determined from the slope. The association constant ( $K_a$ ) as determined by fluorescence titration method for the receptor with  $\text{Hg}^{2+}$  is found to be  $1.36 \times 10^{11} \text{ M}^{-2}$ .

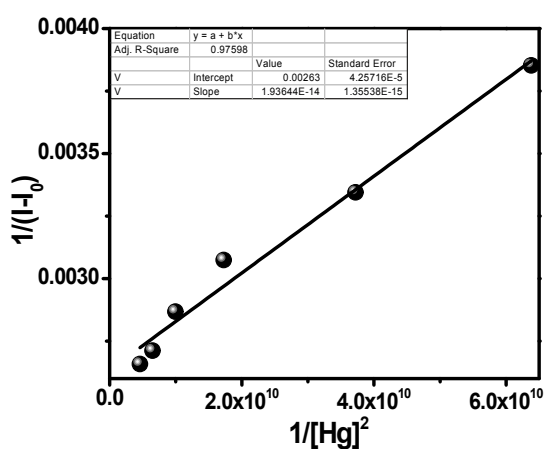

**Fig. S12b:** Benesi-Hildebrand plot from fluorescence titration data of receptor (20  $\mu\text{M}$ ) with  $\text{Hg}^{2+}$ .

### 15. Determination of detection limit:

Detection Limit of **DEAS–BPH** for  $\text{Hg}^{2+}$  was determined from the following equation

$$DL = (K \times SD)/S$$

Where  $K = 2$  or  $3$  (we take  $3$  in this case);  $SD$  is the standard deviation of the blank solution;  $S$  is the slope of the calibration curve.

**For UV–vis:**

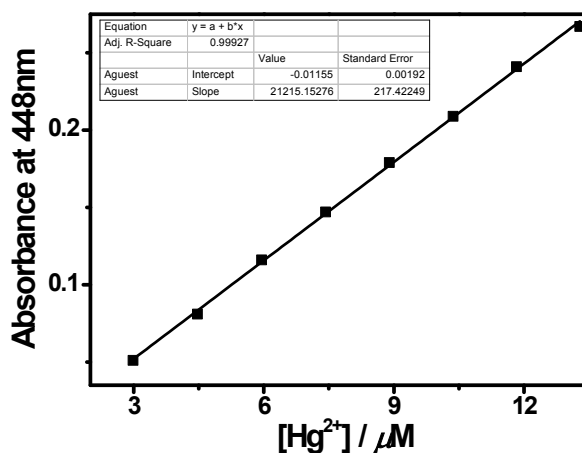

**Fig. S13a**

From the graph, we got  $SD = 0.027$  and  $S = 2.1215 \times 10^4$ .

Thus using the formula we get the Detection limit =  $3.82 \times 10^{-6}$  M i.e. **DEAS–BPH** can detect  $Hg^{2+}$  in this minimum concentration through UV–vis method.

#### For Fluorescence:

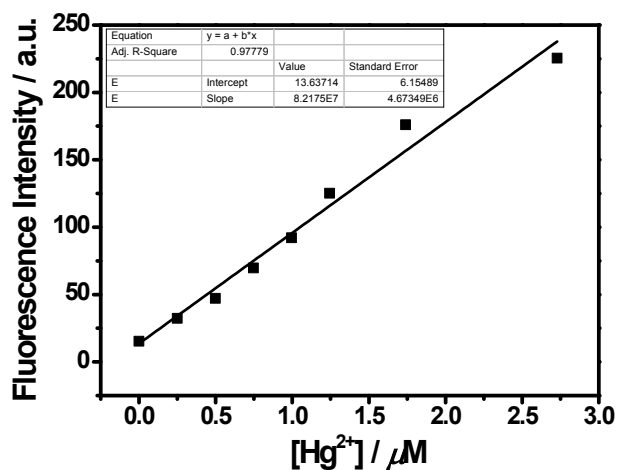**Fig. S13b**

From the graph, we got  $S = 8.2175 \times 10^7$  and  $SD = 15.26$ .

Thus using the formula we get the Detection Limit =  $5.57 \times 10^{-7}$  M i.e. **DEAS–BPH** can detect  $Hg^{2+}$  in this minimum concentration through fluorescence method.

#### 16. Theoretical and computational study:

**Table S1:** Selected optimized geometrical parameters for **DEAS–BPH** and the complex with  $Hg^{2+}$  in the ground state calculated at B3LYP levels

| DEAS–BPH |                   |             |                |
|----------|-------------------|-------------|----------------|
| Bond     | Bond Distance (Å) | Bond        | Bond Angle (°) |
| 14O–15H  | 0.9686            | 15H–14O–5C  | 108.977        |
| 14O–5C   | 1.3592            | 13N–12N–10C | 110.774        |
| 12N–10C  | 1.2987            | 12N–10C–11H | 118.386        |
| 12O–5C   | 1.359             | 12N–10C–4C  | 126.708        |

  

| DEAS–BPH & $Hg^{2+}$ complex |                   |               |                |
|------------------------------|-------------------|---------------|----------------|
| Bond                         | Bond Distance (Å) | Bond          | Bond Angle (°) |
| 105Hg–14O                    | 2.227             | 12N–105Hg–14O | 89.384         |
| 105Hg–66O                    | 2.382             | 64N–105Hg–66O | 80.648         |
| 105Hg–12N                    | 2.276             | 66O–105Hg–14O | 106.157        |
| 105Hg–64N                    | 2.508             | 64N–105Hg–12N | 164.449        |
| 14O–5C                       | 1.359             | 105Hg–14O–5C  | 127.958        |
| 12N–10C                      | 1.369             | 13N–12N–10C   | 112.074        |

**Table S2:** Dominant electronic transitions with oscillator strengths of the **DEAS-BPH** and  $\text{Hg}^{2+}$  complex calculated by TDDFT method

| Excited State | Excitation Energy (eV) | Wavelength $\lambda$ (nm) | Oscillator Strength (f) | Key Transitions                 |
|---------------|------------------------|---------------------------|-------------------------|---------------------------------|
| 1             | 2.311                  | 536.59                    | 0.0124                  | HOMO $\rightarrow$ LUMO (99%)   |
| 2             | 2.647                  | 468.38                    | 0.3044                  | HOMO-1 $\rightarrow$ LUMO (99%) |
| 3             | 2.940                  | 421.80                    | 0.2398                  | HOMO $\rightarrow$ LUMO+1 (96%) |
| 4             | 2.858                  | 433.77                    | 0.8575                  | HOMO $\rightarrow$ LUMO+3 (80%) |

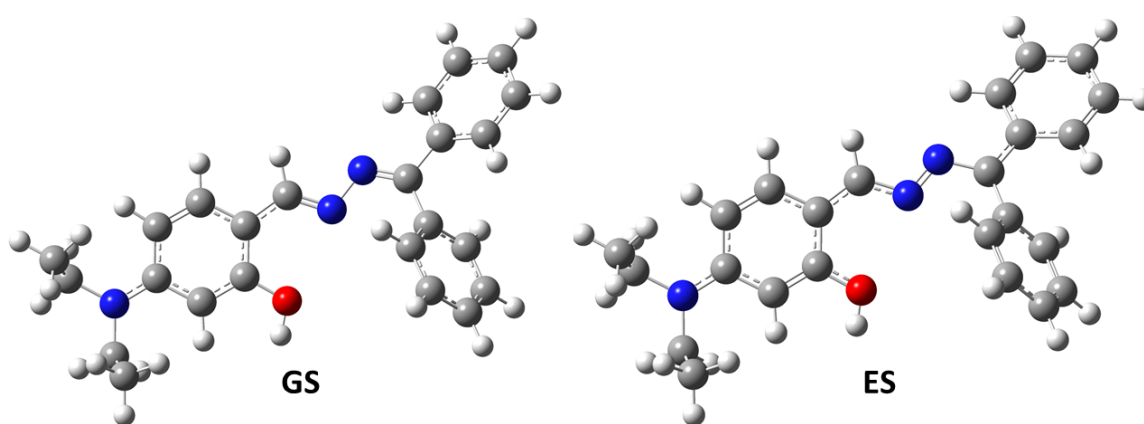

**Fig. S14** Optimized structures of the receptor by DFT/B3LYP/6-31+G(d,p) method.

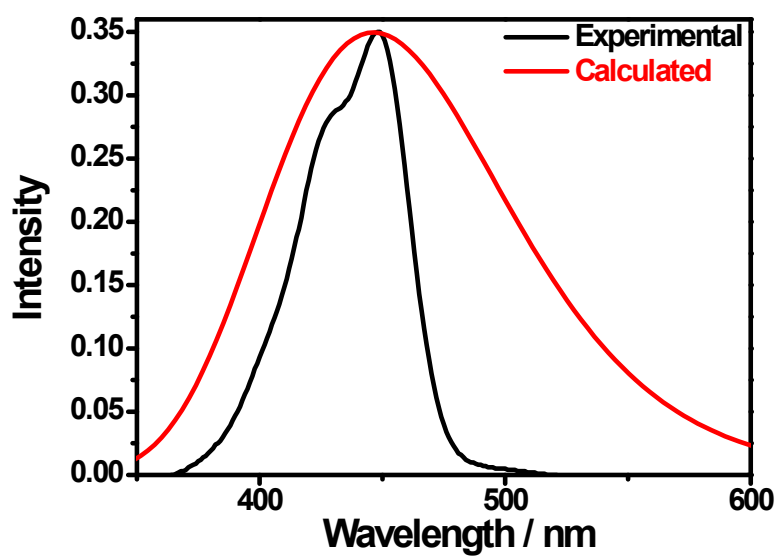

**Fig. S15** UV-vis spectrum of  $[\text{Hg}(\text{DEAS-BPH})_2]$  by TD-DFT method in  $\text{CH}_3\text{CN}$ .

### Molecular orbital plots of DEAS-BPH and its complex:

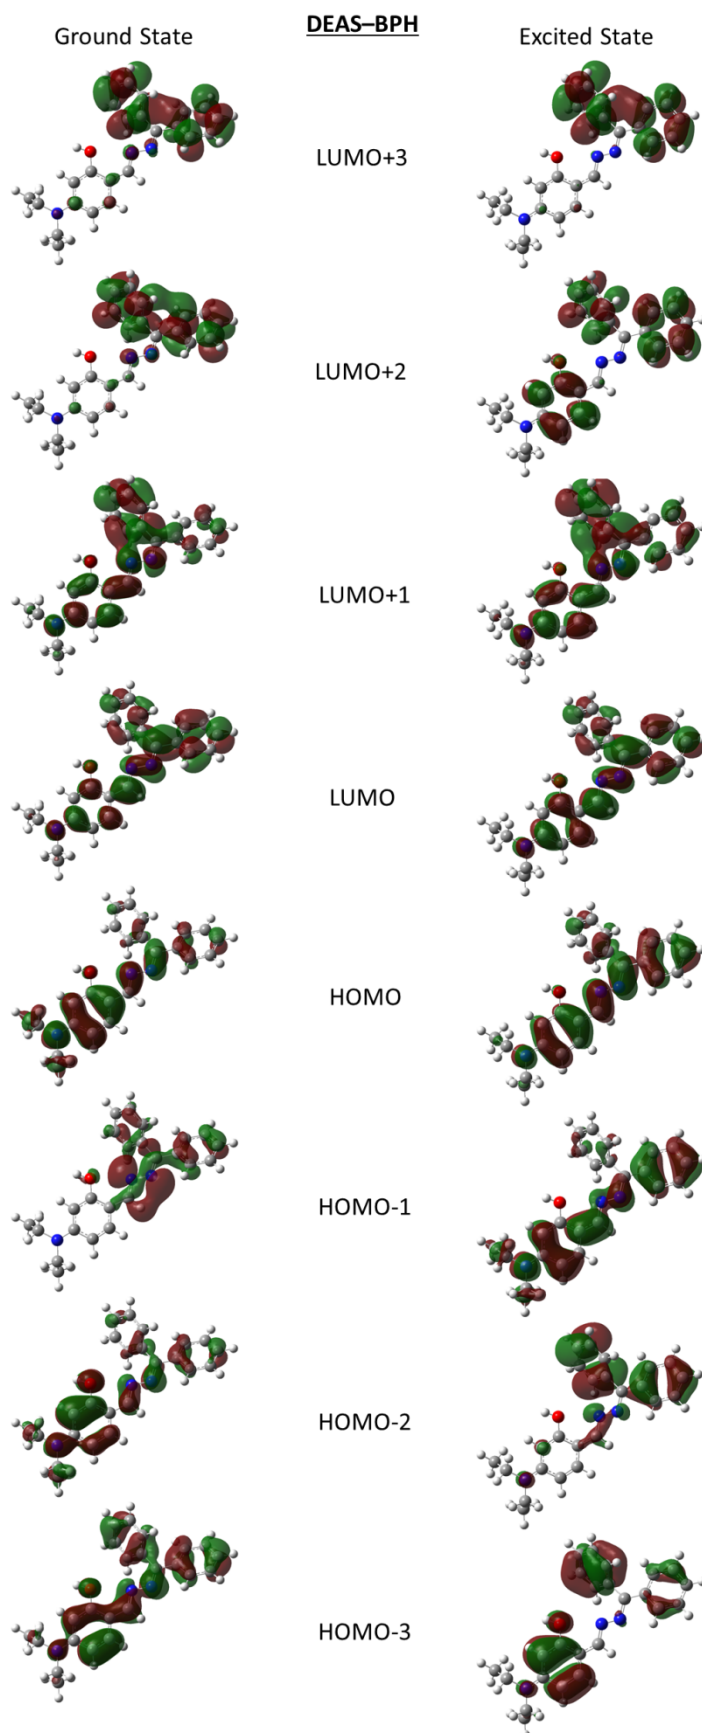



**Fig. S16** Molecular Orbital (MO) diagram of the receptor **DEAS–BPH**.

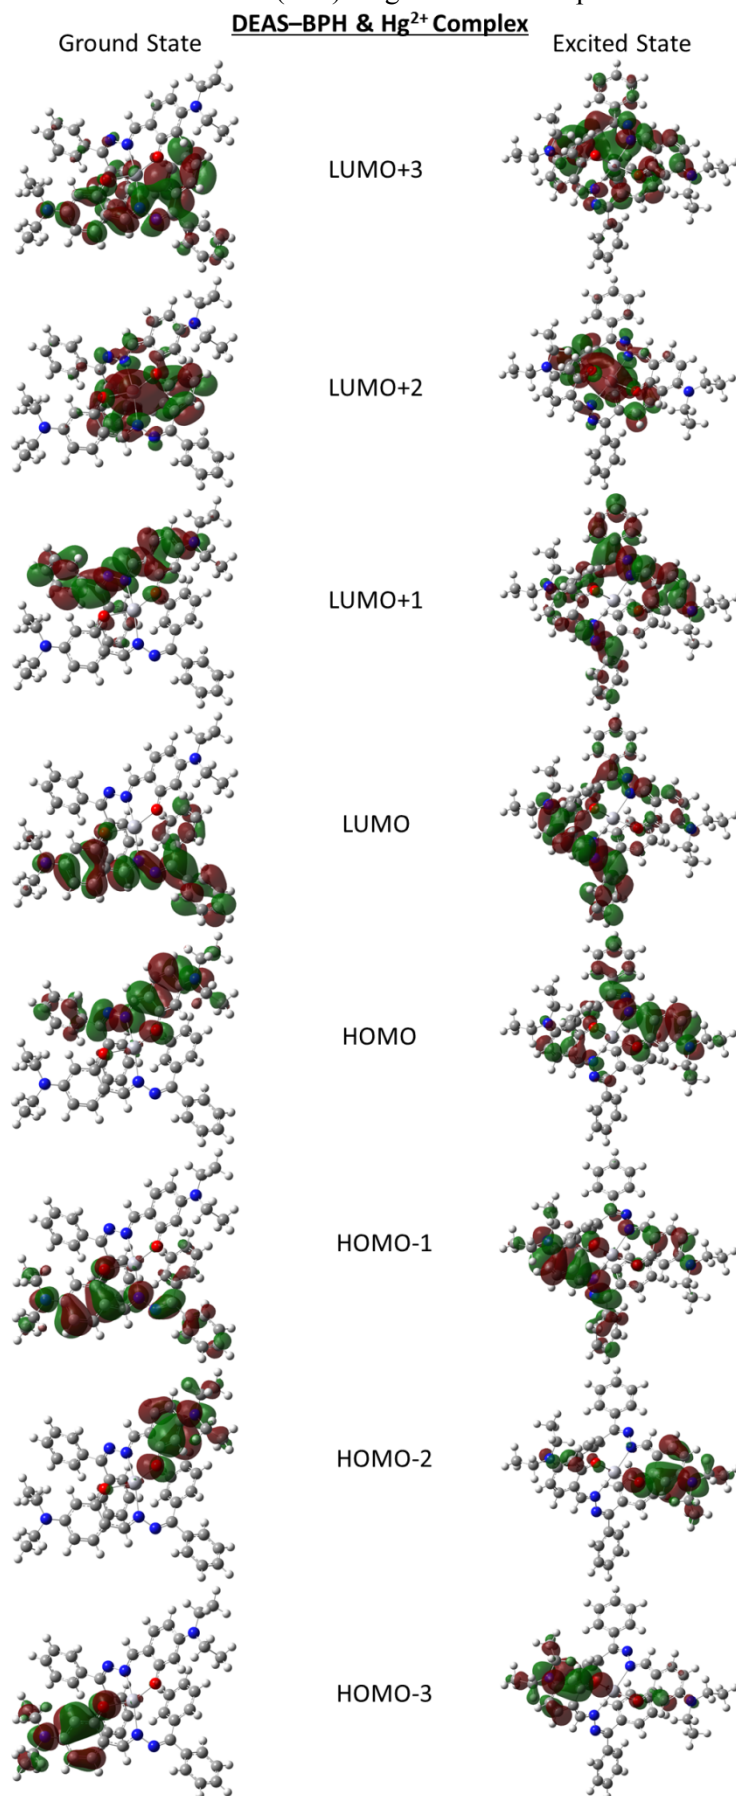

**Fig. S17** Molecular Orbital (MO) diagram of the **DEAS–BPH** and  $\text{Hg}^{2+}$  complex.

**Cartesian Coordinates:**

**Ground State of DEAS–BPH:**

| ATOM | X        | Y        | Z        |
|------|----------|----------|----------|
| C    | 4.42733  | -0.49003 | -0.29192 |
| C    | 3.86471  | -1.75161 | 0.05130  |
| C    | 2.49509  | -1.91329 | 0.09786  |
| C    | 1.57277  | -0.87700 | -0.17139 |
| C    | 2.13864  | 0.38262  | -0.50669 |
| C    | 3.51789  | 0.56385  | -0.55630 |
| H    | 4.49692  | -2.59719 | 0.28417  |
| H    | 2.09806  | -2.89005 | 0.36195  |
| H    | 3.88271  | 1.55222  | -0.80826 |
| C    | 0.16650  | -1.19575 | -0.07241 |
| H    | -0.05371 | -2.24016 | 0.17988  |
| N    | -0.82857 | -0.37906 | -0.24423 |
| N    | -2.04296 | -1.04408 | -0.10321 |
| O    | 1.30091  | 1.41696  | -0.78195 |
| H    | 1.82807  | 2.20133  | -0.99427 |
| C    | -3.10092 | -0.29596 | -0.00392 |
| C    | -4.40607 | -1.01039 | 0.03296  |
| C    | -4.52492 | -2.30257 | -0.51399 |
| C    | -5.53871 | -0.43272 | 0.63335  |
| C    | -5.73416 | -2.98966 | -0.46269 |
| H    | -3.65555 | -2.75216 | -0.98023 |
| C    | -6.74892 | -1.12528 | 0.68818  |
| H    | -5.46898 | 0.55750  | 1.07009  |
| C    | -6.85309 | -2.40427 | 0.13933  |
| H    | -5.80802 | -3.98190 | -0.89833 |
| H    | -7.60987 | -0.66403 | 1.16297  |
| H    | -7.79665 | -2.94050 | 0.17701  |
| C    | -3.09301 | 1.19605  | 0.08379  |
| C    | -3.88590 | 1.95772  | -0.79001 |
| C    | -2.31043 | 1.86371  | 1.03976  |
| C    | -3.88326 | 3.35154  | -0.72219 |
| H    | -4.50032 | 1.45529  | -1.53093 |

|   |          |          |          |
|---|----------|----------|----------|
| C | -2.32193 | 3.25563  | 1.11889  |
| H | -1.69808 | 1.28642  | 1.72326  |
| C | -3.10400 | 4.00425  | 0.23515  |
| H | -4.49344 | 3.92557  | -1.41321 |
| H | -1.71845 | 3.75673  | 1.87004  |
| H | -3.10795 | 5.08859  | 0.29484  |
| N | 5.78706  | -0.30389 | -0.38124 |
| C | 6.72096  | -1.39667 | -0.08754 |
| C | 6.99760  | -1.62499 | 1.40372  |
| H | 7.65779  | -1.16360 | -0.60039 |
| H | 6.34725  | -2.31733 | -0.54667 |
| H | 7.67861  | -2.47312 | 1.52980  |
| H | 7.46321  | -0.74617 | 1.85845  |
| H | 6.07729  | -1.84426 | 1.95238  |
| C | 6.35569  | 1.01164  | -0.69263 |
| C | 6.42650  | 1.98063  | 0.49482  |
| H | 5.78681  | 1.46154  | -1.51334 |
| H | 7.36205  | 0.84128  | -1.08354 |
| H | 6.83722  | 2.94113  | 0.16672  |
| H | 5.43723  | 2.16365  | 0.92366  |
| H | 7.07160  | 1.58796  | 1.28567  |

**Excited State of DEAS–BPH:**

| ATOM | X        | Y        | Z        |
|------|----------|----------|----------|
| C    | 4.42733  | -0.49003 | -0.29192 |
| C    | 3.86471  | -1.75161 | 0.05130  |
| C    | 2.49509  | -1.91329 | 0.09786  |
| C    | 1.57277  | -0.87700 | -0.17139 |
| C    | 2.13864  | 0.38262  | -0.50669 |
| C    | 3.51789  | 0.56385  | -0.55630 |
| H    | 4.49692  | -2.59719 | 0.28417  |
| H    | 2.09806  | -2.89005 | 0.36195  |
| H    | 3.88271  | 1.55222  | -0.80826 |
| C    | 0.16650  | -1.19575 | -0.07241 |
| H    | -0.05371 | -2.24016 | 0.17988  |
| N    | -0.82857 | -0.37906 | -0.24423 |

|   |          |          |          |
|---|----------|----------|----------|
| N | -2.04296 | -1.04408 | -0.10321 |
| O | 1.30091  | 1.41696  | -0.78195 |
| H | 1.82807  | 2.20133  | -0.99427 |
| C | -3.10092 | -0.29596 | -0.00392 |
| C | -4.40607 | -1.01039 | 0.03296  |
| C | -4.52492 | -2.30257 | -0.51399 |
| C | -5.53871 | -0.43272 | 0.63335  |
| C | -5.73416 | -2.98966 | -0.46269 |
| H | -3.65555 | -2.75216 | -0.98023 |
| C | -6.74892 | -1.12528 | 0.68818  |
| H | -5.46898 | 0.55750  | 1.07009  |
| C | -6.85309 | -2.40427 | 0.13933  |
| H | -5.80802 | -3.98190 | -0.89833 |
| H | -7.60987 | -0.66403 | 1.16297  |
| H | -7.79665 | -2.94050 | 0.17701  |
| C | -3.09301 | 1.19605  | 0.08379  |
| C | -3.88590 | 1.95772  | -0.79001 |
| C | -2.31043 | 1.86371  | 1.03976  |
| C | -3.88326 | 3.35154  | -0.72219 |
| H | -4.50032 | 1.45529  | -1.53093 |
| C | -2.32193 | 3.25563  | 1.11889  |
| H | -1.69808 | 1.28642  | 1.72326  |
| C | -3.10400 | 4.00425  | 0.23515  |
| H | -4.49344 | 3.92557  | -1.41321 |
| H | -1.71845 | 3.75673  | 1.87004  |
| H | -3.10795 | 5.08859  | 0.29484  |
| N | 5.78706  | -0.30389 | -0.38124 |
| C | 6.72096  | -1.39667 | -0.08754 |
| C | 6.99760  | -1.62499 | 1.40372  |
| H | 7.65779  | -1.16360 | -0.60039 |
| H | 6.34725  | -2.31733 | -0.54667 |
| H | 7.67861  | -2.47312 | 1.52980  |
| H | 7.46321  | -0.74617 | 1.85845  |
| H | 6.07729  | -1.84426 | 1.95238  |
| C | 6.35569  | 1.01164  | -0.69263 |
| C | 6.42650  | 1.98063  | 0.49482  |

|   |         |         |          |
|---|---------|---------|----------|
| H | 5.78681 | 1.46154 | -1.51334 |
| H | 7.36205 | 0.84128 | -1.08354 |
| H | 6.83722 | 2.94113 | 0.16672  |
| H | 5.43723 | 2.16365 | 0.92366  |
| H | 7.07160 | 1.58796 | 1.28567  |

**Ground State of DEAS–BPH & Hg<sup>2+</sup> Complex:**

| ATOM | X        | Y        | Z        |
|------|----------|----------|----------|
| C    | 4.42733  | -0.49003 | -0.29192 |
| C    | 3.86471  | -1.75161 | 0.05130  |
| C    | 2.49509  | -1.91329 | 0.09786  |
| C    | 1.57277  | -0.87700 | -0.17139 |
| C    | 2.13864  | 0.38262  | -0.50669 |
| C    | 3.51789  | 0.56385  | -0.55630 |
| H    | 4.49692  | -2.59719 | 0.28417  |
| H    | 2.09806  | -2.89005 | 0.36195  |
| H    | 3.88271  | 1.55222  | -0.80826 |
| C    | 0.16650  | -1.19575 | -0.07241 |
| H    | -0.05371 | -2.24016 | 0.17988  |
| N    | -0.82857 | -0.37906 | -0.24423 |
| N    | -2.04296 | -1.04408 | -0.10321 |
| O    | 1.30091  | 1.41696  | -0.78195 |
| C    | -3.10092 | -0.29596 | -0.00392 |
| C    | -4.40607 | -1.01039 | 0.03296  |
| C    | -4.52492 | -2.30257 | -0.51399 |
| C    | -5.53871 | -0.43272 | 0.63335  |
| C    | -5.73416 | -2.98966 | -0.46269 |
| H    | -3.65555 | -2.75216 | -0.98023 |
| C    | -6.74892 | -1.12528 | 0.68818  |
| H    | -5.46898 | 0.55750  | 1.07009  |
| C    | -6.85309 | -2.40427 | 0.13933  |
| H    | -5.80802 | -3.98190 | -0.89833 |
| H    | -7.60987 | -0.66403 | 1.16297  |
| H    | -7.79665 | -2.94050 | 0.17701  |
| C    | -3.09301 | 1.19605  | 0.08379  |
| C    | -3.88590 | 1.95772  | -0.79001 |

|   |          |          |          |
|---|----------|----------|----------|
| C | -2.31043 | 1.86371  | 1.03976  |
| C | -3.88326 | 3.35154  | -0.72219 |
| H | -4.50032 | 1.45529  | -1.53093 |
| C | -2.32193 | 3.25563  | 1.11889  |
| H | -1.69808 | 1.28642  | 1.72326  |
| C | -3.10400 | 4.00425  | 0.23515  |
| H | -4.49344 | 3.92557  | -1.41321 |
| H | -1.71845 | 3.75673  | 1.87004  |
| H | -3.10795 | 5.08859  | 0.29484  |
| N | 5.78706  | -0.30389 | -0.38124 |
| C | 6.72096  | -1.39667 | -0.08754 |
| C | 6.99760  | -1.62499 | 1.40372  |
| H | 7.65779  | -1.16360 | -0.60039 |
| H | 6.34725  | -2.31733 | -0.54667 |
| H | 7.67861  | -2.47312 | 1.52980  |
| H | 7.46321  | -0.74617 | 1.85845  |
| H | 6.07729  | -1.84426 | 1.95238  |
| C | 6.35569  | 1.01164  | -0.69263 |
| C | 6.42650  | 1.98063  | 0.49482  |
| H | 5.78681  | 1.46154  | -1.51334 |
| H | 7.36205  | 0.84128  | -1.08354 |
| H | 6.83722  | 2.94113  | 0.16672  |
| H | 5.43723  | 2.16365  | 0.92366  |
| H | 7.07160  | 1.58796  | 1.28567  |
| C | -3.52650 | 7.80755  | -3.96098 |
| C | -2.90254 | 8.90361  | -4.62070 |
| C | -1.54140 | 9.10040  | -4.50783 |
| C | -0.68818 | 8.26776  | -3.74902 |
| C | -1.31619 | 7.17888  | -3.08630 |
| C | -2.68820 | 6.96681  | -3.18764 |
| H | -3.48155 | 9.59815  | -5.21341 |
| H | -1.09619 | 9.94614  | -5.02547 |
| H | -3.10419 | 6.12425  | -2.64867 |
| C | 0.71641  | 8.60703  | -3.71723 |
| H | 0.99453  | 9.47975  | -4.32051 |
| N | 1.64852  | 7.99299  | -3.05330 |

|   |          |          |          |
|---|----------|----------|----------|
| N | 2.88905  | 8.57865  | -3.28771 |
| O | -0.54557 | 6.33935  | -2.34552 |
| C | 3.85449  | 8.21884  | -2.49568 |
| C | 5.20248  | 8.76027  | -2.81966 |
| C | 5.50547  | 9.17578  | -4.13059 |
| C | 6.19234  | 8.89669  | -1.83042 |
| C | 6.75445  | 9.70669  | -4.43913 |
| H | 4.74695  | 9.07090  | -4.89802 |
| C | 7.44231  | 9.43386  | -2.14075 |
| H | 5.97896  | 8.59266  | -0.81151 |
| C | 7.72987  | 9.83883  | -3.44505 |
| H | 6.97195  | 10.01303 | -5.45826 |
| H | 8.19038  | 9.53744  | -1.36032 |
| H | 8.70475  | 10.25135 | -3.68735 |
| C | 3.70237  | 7.32808  | -1.30519 |
| C | 4.53008  | 6.20336  | -1.15604 |
| C | 2.74683  | 7.5988   | -0.31234 |
| C | 4.39447  | 5.36062  | -0.05208 |
| H | 5.27710  | 5.98422  | -1.91291 |
| C | 2.62392  | 6.76653  | 0.79944  |
| H | 2.10551  | 8.46703  | -0.41374 |
| C | 3.44338  | 5.64211  | 0.93075  |
| H | 5.03491  | 4.48863  | 0.04177  |
| H | 1.88650  | 6.99481  | 1.56339  |
| H | 3.34293  | 4.99206  | 1.79486  |
| N | -4.87455 | 7.56273  | -4.08067 |
| C | -5.73732 | 8.44987  | -4.86884 |
| C | -6.18219 | 9.72670  | -4.14477 |
| H | -6.61733 | 7.86834  | -5.15586 |
| H | -5.22703 | 8.70484  | -5.80301 |
| H | -6.79542 | 10.33906 | -4.81407 |
| H | -6.77894 | 9.49136  | -3.25911 |
| H | -5.32432 | 10.3261  | -3.82717 |
| C | -5.51335 | 6.45616  | -3.36071 |
| C | -5.82255 | 6.74053  | -1.88507 |
| H | -4.88593 | 5.56281  | -3.44936 |

|    |          |         |          |
|----|----------|---------|----------|
| H  | -6.44178 | 6.22402 | -3.88865 |
| H  | -6.27159 | 5.85564 | -1.42222 |
| H  | -4.91702 | 6.99288 | -1.32615 |
| H  | -6.52651 | 7.57111 | -1.78313 |
| Hg | 0.24176  | 3.40339 | -1.12333 |

**Excited State of DEAS–BPH & Hg<sup>2+</sup> Complex:**

| ATOM | X           | Y           | Z           |
|------|-------------|-------------|-------------|
| C    | 4.75957576  | -2.61286690 | -2.06024641 |
| C    | 4.86646751  | -3.42839722 | -0.87047186 |
| C    | 3.94425950  | -3.28794667 | 0.14576132  |
| C    | 2.85734834  | -2.34782888 | 0.10975915  |
| C    | 2.74624311  | -1.51014736 | -1.07974481 |
| C    | 3.70956295  | -1.67269265 | -2.11688034 |
| H    | 5.65990951  | -4.15800475 | -0.76523657 |
| H    | 4.03952756  | -3.92170846 | 1.02715858  |
| H    | 3.57356468  | -1.01927201 | -2.96992545 |
| C    | 1.99694325  | -2.36850633 | 1.24370411  |
| H    | 2.25825213  | -3.11181029 | 2.00143052  |
| N    | 0.90475464  | -1.65078317 | 1.56341394  |
| N    | 0.38913228  | -2.13131896 | 2.78746654  |
| O    | 1.80110039  | -0.59974921 | -1.23828933 |
| C    | -0.67972451 | -1.62702668 | 3.35213592  |
| C    | -1.12925963 | -2.30953332 | 4.60600961  |
| C    | -0.63902277 | -3.59823683 | 4.94047444  |
| C    | -2.04151306 | -1.68487982 | 5.49085971  |
| C    | -1.04660837 | -4.23627461 | 6.12088677  |
| H    | 0.05757029  | -4.07803800 | 4.26125287  |
| C    | -2.44616081 | -2.32538080 | 6.67622083  |
| H    | -2.42960860 | -0.69749550 | 5.25957033  |
| C    | -1.95277564 | -3.60304528 | 6.99773786  |
| H    | -0.66445972 | -5.22660250 | 6.35849222  |
| H    | -3.14334664 | -1.82685000 | 7.34576017  |
| H    | -2.26915474 | -4.09944305 | 7.91227347  |
| C    | -1.48068871 | -0.44734773 | 2.87906814  |
| C    | -2.80614227 | -0.62945796 | 2.42229596  |



|   |             |             |             |
|---|-------------|-------------|-------------|
| C | -0.96291721 | 0.86570851  | 2.97658057  |
| C | -3.60007688 | 0.47635221  | 2.07548339  |
| H | -3.20553413 | -1.63554311 | 2.33050317  |
| C | -1.76595706 | 1.97384563  | 2.63985933  |
| H | 0.04843192  | 1.02110404  | 3.34268412  |
| C | -3.08544797 | 1.78234684  | 2.19245187  |
| H | -4.61053506 | 0.31921944  | 1.70748024  |
| H | -1.35918138 | 2.97764078  | 2.72389274  |
| H | -3.70011071 | 2.63827487  | 1.92544712  |
| N | 5.65976134  | -2.77453658 | -3.11179097 |
| C | 6.78508317  | -3.72734584 | -3.02666285 |
| C | 8.00286099  | -3.21596867 | -2.22104421 |
| H | 7.10409905  | -3.95160694 | -4.05173847 |
| H | 6.43197155  | -4.67579060 | -2.60238999 |
| H | 8.78353470  | -3.98829111 | -2.18366134 |
| H | 8.43194585  | -2.31875446 | -2.68264015 |
| H | 7.71942212  | -2.96426800 | -1.19290767 |
| C | 5.55591073  | -1.94500437 | -4.32953033 |
| C | 6.18037709  | -0.53562979 | -4.20052129 |
| H | 4.50032371  | -1.85694390 | -4.61438825 |
| H | 6.05309429  | -2.48598865 | -5.14429098 |
| H | 6.03154805  | 0.02947975  | -5.13065610 |
| H | 5.71831391  | 0.02617125  | -3.38158229 |
| H | 7.25801390  | -0.59783711 | -4.00695807 |
| C | -4.55647429 | -0.92341898 | -3.32630485 |
| C | -4.50583942 | 0.45339380  | -3.76661259 |
| C | -3.58366334 | 1.31857006  | -3.21603678 |
| C | -2.64100533 | 0.93698827  | -2.19880837 |
| C | -2.69558836 | -0.44429638 | -1.73478294 |
| C | -3.65897676 | -1.31940066 | -2.31340854 |
| H | -5.18225769 | 0.82002305  | -4.52899256 |
| H | -3.56136912 | 2.34939231  | -3.56869889 |
| H | -3.64976952 | -2.32820163 | -1.91929191 |
| C | -1.78443010 | 1.98013604  | -1.74899958 |
| H | -1.97734759 | 2.95202619  | -2.20981993 |
| N | -0.77314257 | 2.01895778  | -0.85534945 |

|   |             |             |             |
|---|-------------|-------------|-------------|
| N | -0.33848211 | 3.36161884  | -0.76218714 |
| O | -1.90887609 | -0.92141778 | -0.78597682 |
| C | 0.62457606  | 3.79461408  | 0.01367399  |
| C | 0.82366800  | 5.28237256  | -0.01763439 |
| C | -0.23282740 | 6.14068509  | -0.41359573 |
| C | 2.06999883  | 5.86140873  | 0.32368795  |
| C | -0.04874502 | 7.53079673  | -0.46344832 |
| H | -1.18599058 | 5.69673443  | -0.68137067 |
| C | 2.25493254  | 7.25487588  | 0.26743035  |
| H | 2.89861657  | 5.22516408  | 0.62038472  |
| C | 1.19750628  | 8.09705602  | -0.12333547 |
| H | -0.87280389 | 8.17421430  | -0.76392781 |
| H | 3.22255691  | 7.67964551  | 0.52469482  |
| H | 1.33953641  | 9.17463939  | -0.16203895 |
| C | 1.52736996  | 3.00072526  | 0.90989574  |
| C | 2.35210764  | 1.97084316  | 0.40535086  |
| C | 1.62310121  | 3.34116885  | 2.28198069  |
| C | 3.24454338  | 1.28883051  | 1.25858874  |
| H | 2.32282934  | 1.70682946  | -0.64780899 |
| C | 2.50858184  | 2.65844928  | 3.13137624  |
| H | 1.01425678  | 4.15216544  | 2.67467864  |
| C | 3.32517278  | 1.62766428  | 2.62051982  |
| H | 3.86705010  | 0.49719418  | 0.85230535  |
| H | 2.56923118  | 2.93223107  | 4.18220653  |
| H | 4.01351278  | 1.09943004  | 3.27568002  |
| N | -5.45497996 | -1.81884942 | -3.90460243 |
| C | -6.43209173 | -1.38412598 | -4.92308545 |
| C | -7.68787575 | -0.68405794 | -4.35163953 |
| H | -6.74256219 | -2.27480193 | -5.48292512 |
| H | -5.93870200 | -0.72470067 | -5.64799990 |
| H | -8.35014896 | -0.36675337 | -5.16903979 |
| H | -8.25192790 | -1.35940049 | -3.69756796 |
| H | -7.41374283 | 0.20171766  | -3.76764495 |
| C | -5.51007118 | -3.22594290 | -3.46010211 |
| C | -6.32734728 | -3.45984477 | -2.16747119 |
| H | -4.48743406 | -3.59835580 | -3.32304201 |

|    |             |             |             |
|----|-------------|-------------|-------------|
| H  | -5.94875827 | -3.81543176 | -4.27484487 |
| H  | -6.28199230 | -4.51875723 | -1.87859937 |
| H  | -5.93178337 | -2.86191333 | -1.33937149 |
| H  | -7.38052854 | -3.18990897 | -2.31135145 |
| Hg | -0.00193655 | -0.04225583 | 0.07802175  |

### 17. Reversibility Study:

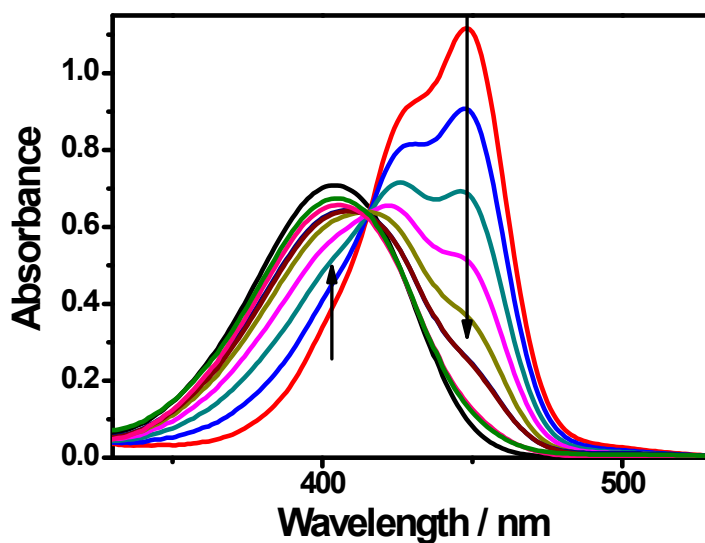

**Fig. S18** Absorption titration spectra of DEAS-BPH ( $6 \mu\text{M}$ ) containing  $\text{Hg}^{2+}$  ( $20 \mu\text{M}$ ) upon increasing the concentration of the  $\text{Na}_2\text{EDTA}$  solution (0 to 10 equivalents).

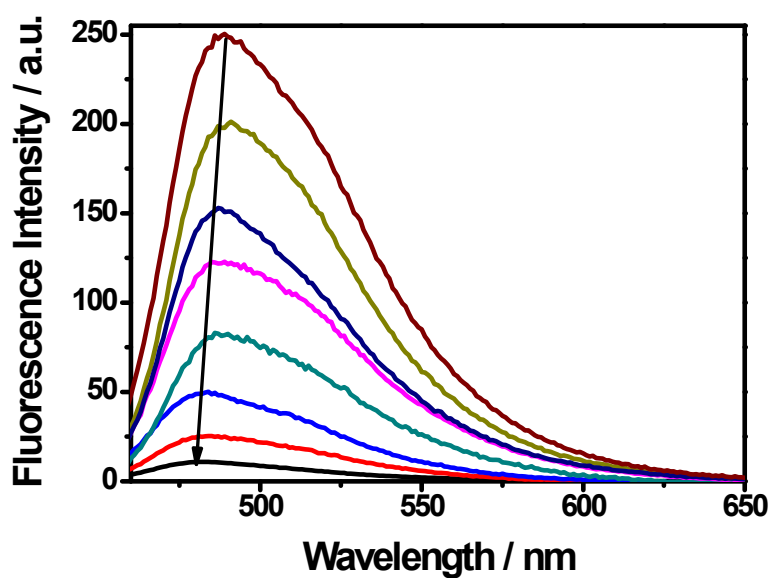

**Fig. S19** Fluorescence titration spectra of **DEAS-BPH** (6  $\mu\text{M}$ ) containing  $\text{Hg}^{2+}$  (20  $\mu\text{M}$ ) upon increasing the concentration of  $\text{Na}_2\text{EDTA}$  (0 to 10 equivalents),  $\lambda_{\text{ex}} = 505 \text{ nm}$ .
